# Supplementary material for: Expression Patterns and Potential Biological Roles of Dip2a
Source: PubMed Central journal article supplement (PMC4659570; doi:10.1371/journal.pone.0143284), 2015-11-25
Supplement: pone.0143284.s002.pdf [file pone.0143284.s002.pdf]

| MATING           | <i>Dip2a</i> <sup>WT/WT</sup> | <i>Dip2a</i> <sup>LacZ/WT</sup> | <i>Dip2a</i> <sup>LacZ/LacZ</sup> |
|------------------|-------------------------------|---------------------------------|-----------------------------------|
| <b>HET × HET</b> | 2                             | 3                               | 4                                 |
| <b>HET × HET</b> | 4                             | 6                               | 6                                 |
| <b>HET × HET</b> | 7                             | 11                              | 3                                 |
| <b>HET × HET</b> | 8                             | 11                              | 3                                 |
| <b>HET × HET</b> | 1                             | 4                               | 3                                 |
| <b>HET × HET</b> | 12                            | 24                              | 11                                |
| <b>HET × HET</b> | 8                             | 9                               | 5                                 |
| <b>HET × HET</b> | 5                             | 28                              | 14                                |
| <b>TOTAL</b>     | <b>47</b>                     | <b>96</b>                       | <b>49</b>                         |
